# Supplementary material
Source: PubMed Central journal article supplement (PMC9548060)
Supplement: jgc-19-9-660-S1.pdf [file jgc-19-9-660-S1.pdf]

**Table 1S Medical diagnoses of the sample according to ICD-10 classification**

| ICD-10 category | Designation                                                                                         | N(%%)      |
|-----------------|-----------------------------------------------------------------------------------------------------|------------|
| A00-B99         | Certain infectious and parasitic diseases                                                           | 22 (36.1%) |
| C00-D48         | Neoplasms                                                                                           | 7 (11.5%)  |
| D50-D90         | Diseases of the blood and blood-forming organs and certain disorders involving the immune mechanism | 11 (18.0%) |
| E00-E90         | Endocrine, nutritional and metabolic diseases                                                       | 52 (85.2%) |
| F00-F99         | Mental, behavioral and neurodevelopmental disorders                                                 | 36 (59.0%) |
| G00-G99         | Diseases of the nervous system                                                                      | 17 (27.9%) |
| H00-H59         | Diseases of the eye and adnexa                                                                      | 2 (3.3%)   |
| H60-H95         | Diseases of the ear and mastoid process                                                             | 1 (1.6%)   |
| I00-I99         | Diseases of the circulatory system                                                                  | 57 (93.4%) |
| J00-J99         | Diseases of the respiratory system                                                                  | 32 (52.5%) |
| K00-K93         | Diseases of the digestive system                                                                    | 22 (36.1%) |
| L00-L99         | Diseases of the skin and subcutaneous tissue                                                        | 6 (9.8%)   |
| M00-M99         | Diseases of the musculoskeletal system and connective tissue                                        | 25 (41.0%) |
| N00-N99         | Diseases of the genitourinary system                                                                | 48 (78.7%) |
| O00-O9A         | Pregnancy, childbirth and the puerperium                                                            | 0          |
| P00-P96         | Certain conditions originating in the perinatal period                                              | 0          |
| Q00-Q99         | Congenital malformations, deformations and chromosomal abnormalities                                | 0          |
| R00-R99         | Symptoms, signs and abnormal clinical and laboratory findings, not elsewhere classified             | 54 (88.5%) |
| S00-T98         | Injury, poisoning and certain other consequences of external causes                                 | 8 (13.1%)  |

ICD-10 = 10th revision of the International Statistical Classification of Diseases and Related Health Problems. The patients' exact ICD-10 codes were grouped into the categories of diagnoses coded by the first three characters of the ICD-10 code. Note: Patients with more than one diagnosis in each ICD-10 category appear only once in the corresponding patient count.
